# Supplementary material for: Deducing Hybrid Performance from Parental Metabolic Profiles of Young Primary Roots of Maize by Using a Multivariate Diallel Approach
Source: PLOS journal article supplement (doi:10.1371/journal.pone.0085435), 2014-01-07

Median Miss-Classification Frequency

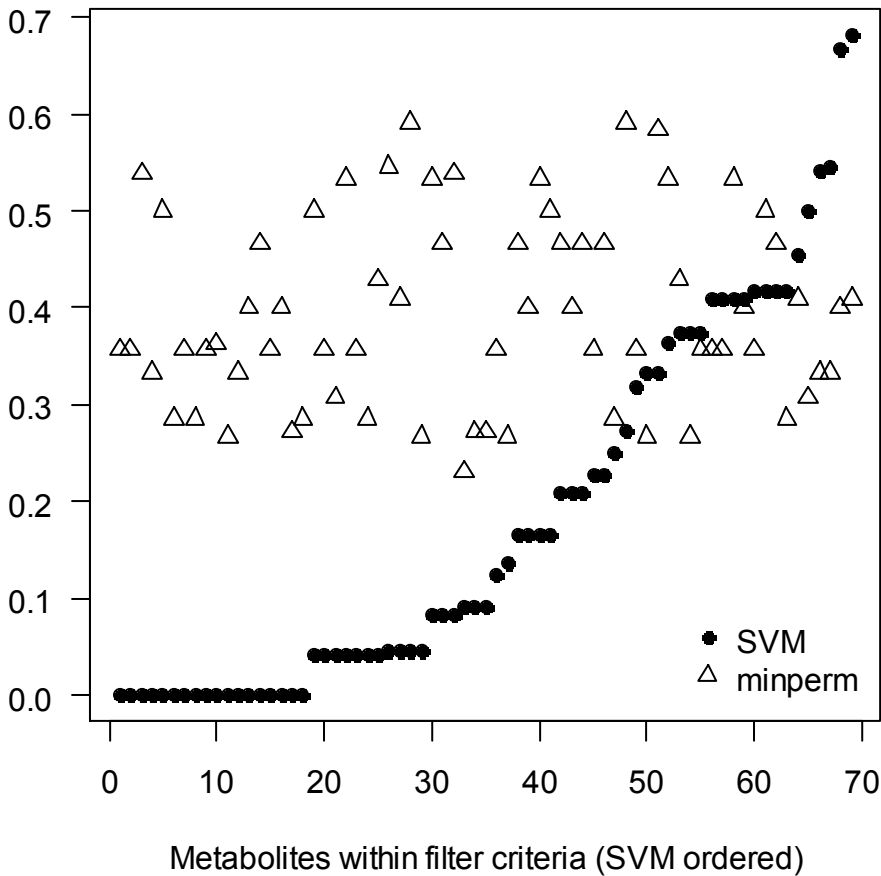

Supplement: S2 (10.1371/journal.pone.0085435.s002) [file journal.pone.0085435.s002]
